# Supplementary material
Source: Elsevier journal article supplement (https://www.sciencedirect.com/science/article/pii/S0300893222001798)

## SUPPLEMENTARY DATA

**Table 1 of the supplementary data.** Inclusion criteria

|                                                                                                                      |
|----------------------------------------------------------------------------------------------------------------------|
| Remain comatose after ROSC (Glasgow Coma Scale score $\leq 8$ )                                                      |
| OHCA in all rhythms: shockable and nonshockable                                                                      |
| Prior exclusion of an obvious noncardiac cause of the cardiac arrest (head CT scan and transthoracic echocardiogram) |
| Nondiagnostic electrocardiogram after ROSC (neither ST-segment elevation nor left bundle branch block)               |
| Absence of exclusion criteria                                                                                        |

CT, computed tomography; OHCA, out of hospital cardiac arrest; ROSC, recovery of spontaneous circulation.

**Table 2 of the supplementary data.** Exclusion criteria

|                                                                                                           |
|-----------------------------------------------------------------------------------------------------------|
| Age < 18 y                                                                                                |
| Pregnant women or women of childbearing age unless they have a negative pregnancy test                    |
| Time to ROSC > 60 min                                                                                     |
| Noncardiac etiology of the comatose state: drug overdose, head injury, or stroke                          |
| Signs of STEMI or left bundle branch block on the ECG                                                     |
| Hemodynamic instability (refractory cardiogenic shock despite vasoactive drugs or refractory arrhythmias) |
| Known coagulopathy or bleeding                                                                            |
| Refusal to participate in the study by the next of kin                                                    |

ECG, electrocardiogram; STEMI, ST-segment elevation myocardial infarction.

**Table 3 of the supplementary data.** Primary outcome measures

|                                                                                                       |
|-------------------------------------------------------------------------------------------------------|
| Survival with good neurological outcome for activities of daily life (CPC 1-2)                        |
| MACE: death, myocardial infarction, clinically evident bleeding (BARC > 2) or ventricular arrhythmias |

BARC, Bleeding Academic Research Consortium; CPC, cerebral performance category; MACE, major adverse cardiac events.

**Table 4 of the supplementary data.** Secondary outcome measures

|                                                                                                                  |
|------------------------------------------------------------------------------------------------------------------|
| Hospital survival                                                                                                |
| Neurological outcome assessed by the CPC scale                                                                   |
| Left ventricular ejection fraction                                                                               |
| Infarction size defined by the maximum CPK and troponin                                                          |
| Vascular complications: fistula, pseudoaneurysm, or clinically evident hematoma (BARC $\geq$ 2)                  |
| Clinically evident hemorrhage: BARC $\geq$ 2                                                                     |
| Sustained ventricular arrhythmias or requirement of cardioversion                                                |
| Acute renal failure: creatinine increase of $> 0.5$ mg/dL or $> 50\%$ baseline                                   |
| Reinfarction: according to the universal definition of acute myocardial infarction                               |
| Stent thrombosis defined by the ARC                                                                              |
| Infections: high inflammatory markers (CRP, procalcitonin, leukocytosis with neutrophilia) requiring antibiotics |
| Length of intubation                                                                                             |
| Length of hospital stay                                                                                          |

ARC, Academic Research Consortium; BARC, Bleeding Academic Research Consortium; CPC, cerebral performance category; CPK, creatine phosphokinase; CRP, C-reactive protein.

**Figure 1 of the supplementary data** Flow chart of the COUPE trial. CT, computed tomography; LVEF, left ventricular ejection fraction; ROSC, return of spontaneous circulation.

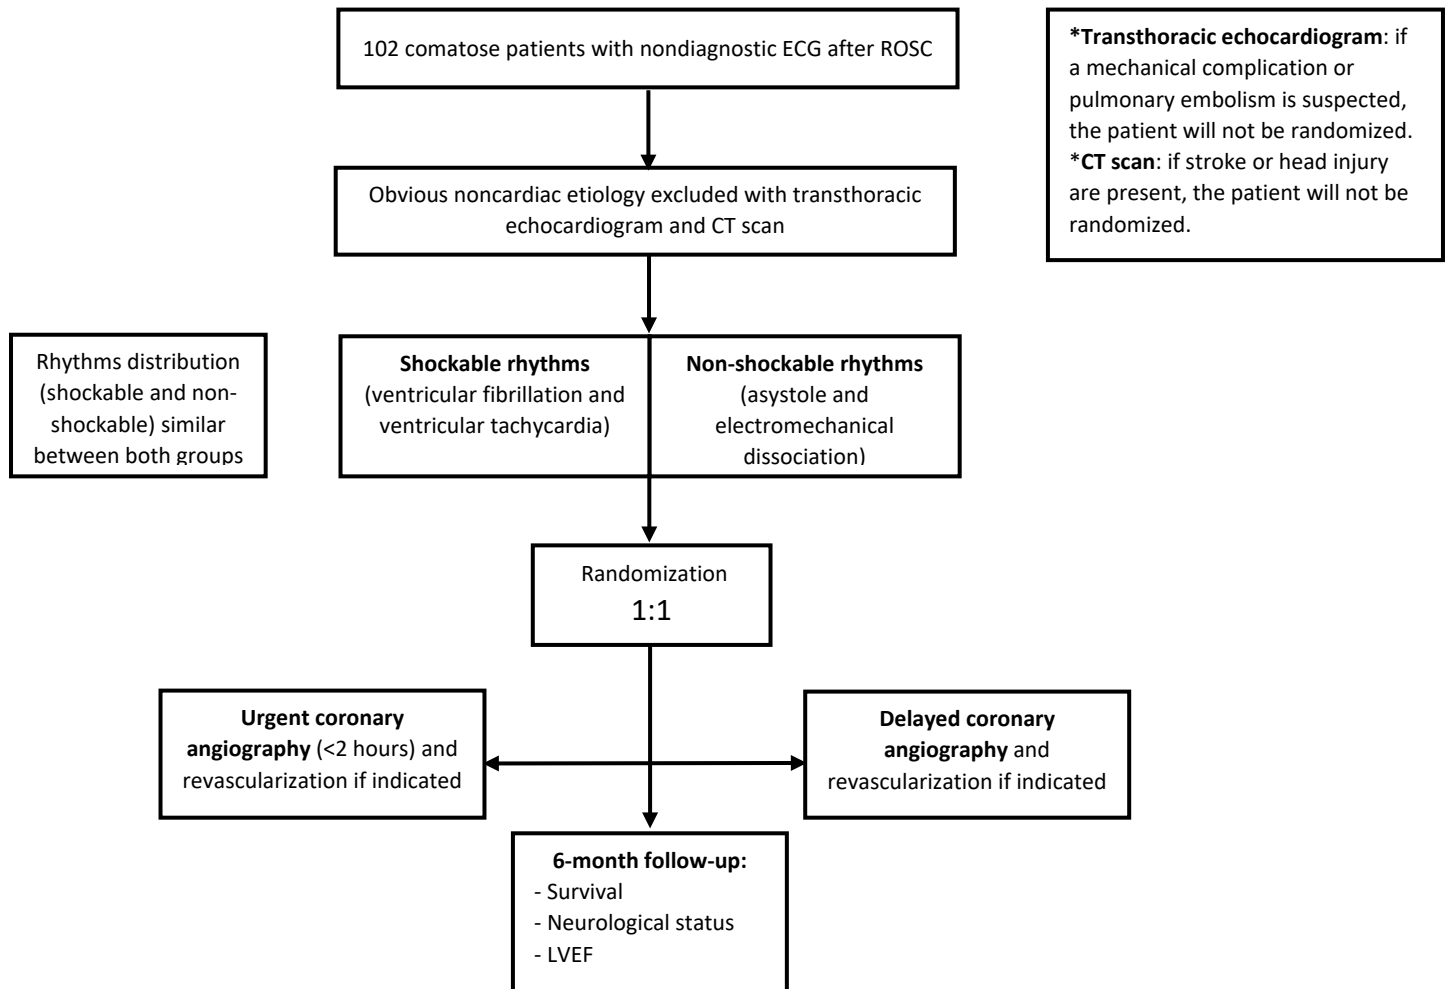

Supplement: mmc1 [file mmc1.pdf]
